# Supplementary material
Source: Springer Nature journal article supplement (https://www.springermedizin.de/resource/supplementary/12889_2009_2310_MOESM1_ESM.pdf/9485348)
Supplement: MOESM1 [file 9485348]

Culture confirmed tuberculosis cases  
not included in pulmonary cohort  
**322**

Medical records  
obtained  
**311**

Medical records not  
obtained  
**11**

No previous TB  
treatment  
documented  
**307**

Documented TB  
treatment after year  
1970  
**4**

Non-pulmonary cases  
after reassessment  
**276**

Pulmonary cases after  
revision  
**27**

Localisation of disease  
unknown  
**4**
